# Supplementary material
Source: PubMed Central journal article supplement (PMC4755670)
Supplement: ppj-32-008-suppl.pdf [file ppj-32-008-suppl.pdf]

## Supplimentary Data

Table. Primer sequences of 40 ABC transporter genes, internal reference gene (18Sr), annealing temperatures, and the lengths of amplified cDNA fragments

| ABC transporter and 18s rRNA Genes | Primer sequence (5'→3')       | Annealing temperature (°C) | Amplified fragment length (bp) |
|------------------------------------|-------------------------------|----------------------------|--------------------------------|
| 18S rRNA-F                         | 5'-CGAAAGCATTACCAAGGAC- 3'    | 58                         | 300                            |
| 18S rRNA-R                         | 5'-TTATTGTGTCTGGACCTGG- 3'    | 58                         | 324                            |
| MGG 00239-F                        | 5'-CTCACCCGACCCCAAGAT- 3'     | 55                         | 288                            |
| MGG 00239-R                        | 5'-ATTCTGGCGATAGGGCAAGT- 3'   | 55                         |                                |
| MGG 00447-F                        | 5'-AACATTTCCCGATGCAGTCA- 3'   | 55                         | 216                            |
| MGG 00447-R                        | 5'-ACACCAGTGTAGCCGTAGCG- 3'   | 55                         |                                |
| MGG 01563-F                        | 5'-ACTTTGACGAGGCTGCAATG- 3'   | 55                         | 269                            |
| MGG 01563-R                        | 5'-TTGTTCGTCGTCCTCGAATCAT- 3' | 55                         |                                |
| MGG 01674-F                        | 5'-AGGAATCCAGCATGACCCTC- 3'   | 55                         | 252                            |
| MGG 01674-R                        | 5'-AGATGCAAACAGCGACCAAG- 3'   | 55                         |                                |
| MGG 02348-F                        | 5'-CGACCCCAAGTAATCCAGT- 3'    | 55                         | 201                            |
| MGG 02348-R                        | 5'-TGCTCCCCGGTGTATATGAA- 3'   | 55                         |                                |
| MGG 03406-F                        | 5'-TCAACCAGCTCGTTTTCCAG- 3'   | 55                         | 141                            |
| MGG 03406-R                        | 5'-CATCCGGCTGCTCTTTGATA- 3'   | 55                         |                                |
| MGG 03736-F                        | 5'-GGCCCTTGTTTTGAGAAGG- 3'    | 55                         | 252                            |
| MGG 03736-R                        | 5'-AGGAGGGTCAGCGAGACGAT- 3'   | 55                         |                                |

## Supplimentary Data

Table. Primer sequences of 40 ABC transporter genes, internal reference gene (18Sr), annealing temperatures, and the lengths of amplified cDNA fragments

| ABC transporter and 18s rRNA Genes | Primer sequence (5'→3')      | Annealing temperature (°C) | Amplified fragment length (bp) |
|------------------------------------|------------------------------|----------------------------|--------------------------------|
| MGG 04855-F                        | 5'-TTCATTTCCTTTTTCGCATCG- 3' | 55                         | 250                            |
| MGG 04855-R                        | 5'-CTGTGCTCCCAGGCAAAGTA- 3'  | 55                         |                                |
| MGG 04899-F                        | 5'-TCAGCGACACTCTGTACGCA- 3'  | 55                         | 101                            |
| MGG 04899-R                        | 5'-AATGGTTGACTGAAGCAGCG- 3'  | 55                         |                                |
| MGG 05009-F                        | 5'-TCGCTTTGTCTTTTGTGG- 3'    | 55                         | 191                            |
| MGG 05009-R                        | 5'-GAAGATGCTTATGGGCAGCA- 3'  | 55                         |                                |
| MGG 05044-F                        | 5'-ACCATTGCTCGTCTTTGCAG- 3'  | 55                         | 203                            |
| MGG 05044-R                        | 5'-GAGGCTTCTCTGGGGTCTTG- 3'  | 55                         |                                |
| MGG 05190-F                        | 5'-ATCCGCTGGAACAATGTCAA- 3'  | 55                         | 141                            |
| MGG 05190-R                        | 5'-CATCAGGCGGAAATTGTGG- 3'   | 55                         |                                |
| MGG 05595-F                        | 5'-TCGTGCGACTTGAGAAGCACC- 3' | 54.9                       | 279                            |
| MGG 05595-R                        | 5'-CGCCGTTGTACGATATGCTT- 3'  | 55                         |                                |
| MGG 05746-F                        | 5'-GGCGCAGTACTGGAAAGTGA- 3'  | 55                         | 223                            |
| MGG 05746-R                        | 5'-GGTCCAAGCCTCCATGAGAT- 3'  | 55                         |                                |
| MGG 06024-F                        | 5'-CGCTAATGTCGCAGGATTGT- 3'  | 55                         | 291                            |
| MGG 06024-R                        | 5'-TTGCATTTCGAATCTCCTCG- 3'  | 55                         |                                |

## Supplimentary Data

Table. Primer sequences of 40 ABC transporter genes, internal reference gene (18Sr), annealing temperatures, and the lengths of amplified cDNA fragments

| ABC transporter and 18s rRNA Genes | Primer sequence (5'→3')     | Annealing temperature (°C) | Amplified fragment length (bp) |
|------------------------------------|-----------------------------|----------------------------|--------------------------------|
| MGG 06707-F                        | 5'-CGTGAGATCATGGAGTTGGC- 3' | 54.9                       | 291                            |
| MGG 06707-R                        | 5'-TTGCTTGAGCGAAAAGGAGA- 3' | 54.9                       |                                |
| MGG 06878-F                        | 5'-TGGTCAAAGATTCCGGTTCA- 3' | 55                         | 239                            |
| MGG 06878-R                        | 5'-TCATCTTGCAGGCTCGTCTC- 3' | 55                         |                                |
| MGG 07375-F                        | 5'-ACGATGGACGAGAGCCTTCT- 3' | 55                         | 287                            |
| MGG 07375-R                        | 5'-ATGTAGAGCAGCCGGAACCT- 3' | 55                         |                                |
| MGG 07567-F                        | 5'-ACCCCACTACTCGTTCCGAC- 3' | 55                         | 108                            |
| MGG 07567-R                        | 5'-GAATGAGATGCGCTTCCGTA- 3' | 55                         |                                |
| MGG 07848-F                        | 5'-ACATGCTCGAGGTCATTGGA- 3' | 55                         | 279                            |
| MGG 07848-R                        | 5'-TTCCAAAGGACAAGATCCCC- 3' | 55                         |                                |
| MGG 08309-F                        | 5'-CGATCTGACCGAGATTGGTC- 3' | 55                         | 290                            |
| MGG 08309-R                        | 5'-GATCATCAAAGGTGCCAACG- 3' | 55                         |                                |
| MGG 08970-F                        | 5'-CATCTGTCCCACGTTCTGG- 3'  | 54.9                       | 182                            |
| MGG 08970-R                        | 5'-CCACCGTCTCATCGAGTTG- 3'  | 55.1                       |                                |
| MGG 09931-F                        | 5'-TTTTCAACAGTTTCGGCAGG- 3' | 55                         | 231                            |
| MGG 09931-R                        | 5'-AGTAGCCAAAGCCGTTAGCC- 3' | 55                         |                                |

## Supplimentary Data

Table. Primer sequences of 40 ABC transporter genes, internal reference gene (18Sr), annealing temperatures, and the lengths of amplified cDNA fragments

| ABC transporter and 18s rRNA Genes | Primer sequence (5'→3')      | Annealing temperature (°C) | Amplified fragment length (bp) |
|------------------------------------|------------------------------|----------------------------|--------------------------------|
| MGG 10277-F                        | 5'-TATCGACCTGCTCGAGATGC- 3'  | 55                         | 278                            |
| MGG 10277-R                        | 5'-GCAGCTCGTCAAAGTTCTCG- 3'  | 54.9                       |                                |
| MGG 10410-F                        | 5'-GCAGGGAAAAGGTTTCAGAGG- 3' | 55                         | 145                            |
| MGG 10410-R                        | 5'-TCAGACAGCCTGGTGGGATA- 3'  | 55                         |                                |
| MGG 11025-F                        | 5'-CTGCTAGGGTCTTGTTGGCA- 3'  | 55                         | 234                            |
| MGG 11025-R                        | 5'-CCTGAAGAAGGTCCAAAGGC- 3'  | 55                         |                                |
| MGG 11220-F                        | 5'-GGGGTTTCAAGAGCTTCGTC- 3'  | 55                         | 271                            |
| MGG 11220-R                        | 5'-GACAGCGTGGCGTAGAGGTA- 3'  | 55                         |                                |
| MGG 11291-F                        | 5'-CTGAGGAAACACGGCAAAAA- 3'  | 55                         | 255                            |
| MGG 11291-R                        | 5'-CTGCGATGAGGTGCTTAGGA- 3'  | 55.1                       |                                |
| MGG 11382-F                        | 5'-CGTATCGCCTACTTGTCCGA- 3'  | 55                         | 288                            |
| MGG 11382-R                        | 5'-CTCCCAGTCTGGAGGGTTGT- 3'  | 55                         |                                |
| MGG 11862-F                        | 5'-CGAGTGGGTTGTGACAGAGG- 3'  | 55                         | 146                            |
| MGG 11862-R                        | 5'-TTGAGAAGGTGGAAGGGTCC- 3'  | 55.1                       |                                |
| MGG 13491-F                        | 5'-CGCCTTCCTCGACAAGTACA- 3'  | 55                         | 102                            |
| MGG 13491-R                        | 5'-ACAATTGAAGCGACGAGTGC- 3'  | 55                         |                                |

## Supplimentary Data

Table. Primer sequences of 40 ABC transporter genes, internal reference gene (18Sr), annealing temperatures, and the lengths of amplified cDNA fragments

| ABC transporter and 18s rRNA Genes | Primer sequence (5'→3')      | Annealing temperature (°C) | Amplified fragment length (bp) |
|------------------------------------|------------------------------|----------------------------|--------------------------------|
| MGG 13624-F                        | 5'-CTTCGATGGGAGTCATCACG- 3'  | 55                         | 243                            |
| MGG 13624-R                        | 5'-CGACAGCATCGGCATACTCT- 3'  | 54.9                       |                                |
| MGG 13630-F                        | 5'-CCTGGACGATTTTACGCTGA- 3'  | 54.9                       | 104                            |
| MGG 13630-R                        | 5'-ACCACCTCTCCAACAGACCC- 3'  | 54.8                       |                                |
| MGG 13762-F                        | 5'-GAACAAACACGTCCGTCAGG- 3'  | 55                         | 101                            |
| MGG 13762-R                        | 5'-ACAAGACGAAAGCCATGCAG- 3'  | 55                         |                                |
| MGG 14069-F                        | 5'-ACCGAGACGGAGCAAAAGAT- 3'  | 55                         | 182                            |
| MGG 14069-R                        | 5'-GAGTATTTGCCCTTTTGGC- 3'   | 55                         |                                |
| MGG 14400-F                        | 5'-TATCCAAAACAAAGCGACCG- 3'  | 55                         | 295                            |
| MGG 14400-R                        | 5'-GGACAAGGTTTCGGACAAGGT- 3' | 55                         |                                |
| MGG 14457-F                        | 5'-CCTTGGCCTTGTGCTTTGTA- 3'  | 55                         | 128                            |
| MGG 14457-R                        | 5'-GCAGCTGTGCAGGTAACGAT- 3'  | 55                         |                                |
| MGG 14543-F                        | 5'-CCTTGGCCTTGTGCTTTGTA- 3'  | 55                         | 128                            |
| MGG 14543-R                        | 5'-GCAGCTGTGCAGGTAACGAT- 3'  | 55                         |                                |
| MGG 00141-F                        | 5'-CCATTGTTTCAGTTCATCGCC- 3' | 55                         | 278                            |
| MGG 00141-R                        | 5'-CCAGCCAATAGCCAAACTCA- 3'  | 54.9                       |                                |
